# Supplementary material for: Perturbed development of cranial neural crest cells in association with reduced sonic hedgehog signaling underlies the pathogenesis of retinoic-acid-induced cleft palate
Source: PubMed Central journal article supplement (PMC6826016; doi:10.1242/dmm.040279), 2019-10-01
Supplement: dmm-12-040279-s1.pdf [file dmm-12-040279-s1.pdf]

| <b>down – regulated<br/>gene</b> | <b>Log2FC (Log2FC &lt; -<br/>1 or Log2FC &gt; 1)</b> |
|----------------------------------|------------------------------------------------------|
| <b>Sim2</b>                      | <b>-2.39</b>                                         |
| <b>Ugt2a1</b>                    | <b>-1.95</b>                                         |
| <b>Cyp26c1</b>                   | <b>-1.54</b>                                         |
| <b>Sult1e1</b>                   | <b>-1.12</b>                                         |
| <b>mt-Tl1</b>                    | <b>-1.09</b>                                         |
| <b>Shh</b>                       | <b>-1.06</b>                                         |
| <b>Gm129</b>                     | <b>1.02</b>                                          |
| <b>Gm14506</b>                   | <b>1.26</b>                                          |

**Table S1. Differentially expressed transcripts in the medial nasal process, the lateral nasal process, and the maxillary process of RA-treated embryos at E11.5. Transcripts were selected by identifying those having a fold change Log2FC < -1 or Log2FC > 1 in RA-treated versus control embryos, as described in the Methods section.**
